# Supplementary material
Source: PubMed Central journal article supplement (PMC5966296)
Supplement: NIHMS956097-supplement-supplement.pdf [file NIHMS956097-supplement-supplement.pdf]

## Supplementary Online Content

Beveridge LA, Struthers AD, Khan F, et al; D-PRESSURE Collaboration. Effect of vitamin D supplementation on blood pressure: a systematic review and meta-analysis incorporating individual patient data. *JAMA Intern Med*. Published online March 16, 2015. doi:10.1001/jamainternmed.2015.0237

**eAppendix.** Search Strategy for D-PRESSURE Systematic Review

**eTable 1.** Characteristics of Included Studies

**eTable 2.** Risk of Bias Table for All Included Studies

**eFigure 1.** Funnel Plot for Trial-Level Systolic Blood Pressure Treatment Effects

**eFigure 2.** Results of Trial-Level Meta-analysis for Diastolic Blood Pressure Outcomes

**eFigure 3.** Meta-regression of Treatment Effect vs Mean Trial-Level Baseline Systolic Blood Pressure

**eFigure 4.** Results of Individual Patient Data Analysis Using Final Diastolic Blood Pressure (BP) Adjusted for Baseline BP

This supplementary material has been provided by the authors to give readers additional information about their work.

**eAppendix: Search strategy for D-PRESSURE systematic review**

[vitamin D OR vitamin D2 OR vitamin D3 OR cholecalciferol OR ergocalciferol OR  
alphacalcidol OR alfacalcidol OR calcitriol OR paricalcitol OR doxerocalciferol]

AND

[randomised controlled trial OR placebo]

AND

[blood pressure OR hypertension OR vascular OR cardiovascular OR mortality]

Applied to all fields within database; not restricted to MeSH headings

**eTable 1. Characteristics of Included Studies**

| <i>Study</i>                               | <i>N</i> | <i>Latitude</i> | <i>Study Population</i>                             | <i>Outcomes</i>                           | <i>Mean Age</i> | <i>% Male</i> | <i>Mean baseline 25OHD (nmol/l)</i> | <i>Mean baseline SBP (mmHg)</i> | <i>Control</i>                | <i>Intervention</i>                                               | <i>Duration</i> |
|--------------------------------------------|----------|-----------------|-----------------------------------------------------|-------------------------------------------|-----------------|---------------|-------------------------------------|---------------------------------|-------------------------------|-------------------------------------------------------------------|-----------------|
| Lind et al <sup>1</sup> , Sweden, 1987     | 29       | 60° N           | Healthy volunteers with intermittent hypercalcaemia | Blood pressure                            | 63              | 40            | Not known                           | 149                             | Placebo                       | Alphacalcidol 1 µg/day                                            | 6 months        |
| Lind et al <sup>2</sup> , Sweden, 1988a    | 36       | 61° N           | Patients with primary hyperparathyroidism           | Blood pressure                            | 65              | 19            | Not known                           | 149                             | Placebo                       | Alphacalcidol (0.25 µg/day up-titrated to 1 µg/day after 8 weeks) | 6 months        |
| Lind et al <sup>3</sup> , Sweden, 1988b    | 65       | 60° N           | Patients with impaired glucose tolerance            | Blood pressure and glucose tolerance      | Not stated      | 100           | Not known                           | 152                             | Placebo                       | Alphacalcidol 0.75µg/day                                          | 12 weeks        |
| Lind et al <sup>4</sup> , Sweden, 1989     | 42       | 61° N           | Patients with mild to moderate hypertension         | Blood pressure and plasma renin activity  | 51              | 80            | Not known                           | 157                             | Placebo                       | Alphacalcidol 1µg/day                                             | 18 weeks        |
| Myrup et al <sup>5</sup> , Denmark, 1992   | 113      | 56° N           | Elderly female patients                             | Blood pressure, cholesterol, weight       | 70              | 0             | Not known                           | 101 (MAP)                       | Placebo                       | Calcitriol 0.5µg/day                                              | 12 months       |
| Pan et al <sup>6</sup> , Taiwan, 1993      | 58       | 25° N           | Institutionalised adults                            | Blood pressure                            | 74              | 78            | 61                                  | 133                             | Placebo                       | Cholecalciferol 200IU/day + placebo                               | 11 weeks        |
| Scragg et al <sup>7</sup> , England, 1995  | 191      | 52° N           | Elderly patients                                    | Blood pressure, cholesterol               | 70              | 54            | 35                                  | 148                             | Placebo                       | Cholecalciferol 100,000IU once-off                                | 5 weeks         |
| Pfeifer et al <sup>8</sup> , Germany, 2001 | 148      | 52° N           | Elderly female patients                             | Blood pressure, cholesterol               | 75              | 0             | 25                                  | 142                             | Calcium 1200mg/daily +Placebo | Calcium 1200mg/ daily + Cholecalciferol 800IU/day                 | 8 weeks         |
| Schleithoff et al <sup>9</sup> , Germany,  | 123      | 51° N           | Heart failure patients                              | Blood pressure, cytokine levels, survival | 55              | 83            | 38 (median)                         | 123                             | Calcium 500mg once/daily +    | Calcium 500mg/ once daily + Cholecalciferol 2000IU/day            | 9 months        |

|                                                |     |               |                                                                       |                                                                                       |    |     |    |                 |                             |                                                                                                                  |           |
|------------------------------------------------|-----|---------------|-----------------------------------------------------------------------|---------------------------------------------------------------------------------------|----|-----|----|-----------------|-----------------------------|------------------------------------------------------------------------------------------------------------------|-----------|
| 2006                                           |     |               |                                                                       |                                                                                       |    |     |    |                 | placebo                     |                                                                                                                  |           |
| Alborzi et al <sup>10</sup> , USA, 2008        | 24  | 40° N         | Patients with chronic kidney disease and on ACE-I or ARB              | Endothelial function, 24 hour ambulatory BP, GFR, CRP                                 | 70 | 83  | 34 | 125.4 (24hr BP) | Placebo                     | Paricalcitol 1µg daily<br>Paricalcitol 2µg daily                                                                 | 1 month   |
| Sugden et al <sup>11</sup> , Scotland, 2008    | 34  | 56 ° N        | Type 2 Diabetes patients                                              | Endothelial function, blood pressure, insulin sensitivity                             | 64 | 53  | 38 | 141             | Placebo                     | Ergocalciferol 100,000IU single dose                                                                             | 8 weeks   |
| Nagpal et al <sup>12</sup> , India, 2009       | 100 | 28° N         | Centrally obese, non-diabetic, healthy males                          | Insulin sensitivity, insulin secretion, lipid concentration, blood pressure           | 44 | 100 | 33 | 124             | Placebo                     | Cholecalciferol 120,000IU /2 weekly                                                                              | 6 weeks   |
| Zittermann et al <sup>13</sup> , Germany, 2009 | 200 | 52° N         | Healthy overweight subjects participating in weight reduction program | Weight loss, cardiovascular disease risk markers including blood pressure             | 48 | 33  | 30 | 128             | Placebo                     | Cholecalciferol 3332 IU/day                                                                                      | 12 months |
| Jorde et al <sup>14</sup> , Norway, 2010       | 438 | 69° N         | Overweight or obese subjects without diabetes or IHD                  | Cardiovascular risk factors                                                           | 48 | 36  | 58 | 124             | Placebo + 500mg calcium/day | Cholecalciferol 20,000 IU weekly + 500mg calcium/day<br><br>Cholecalciferol 40,000 IU weekly + 500mg calcium/day | 12 months |
| Witham et al <sup>15</sup> , Scotland, 2010a   | 61  | 56° N         | Type II Diabetes and baseline Vitamin D <100nmol/l                    | Endothelial function, blood pressure, markers of glycaemic control                    | 65 | 67  | 45 | 146             | Placebo                     | 100,000 IU Cholecalciferol<br>200,000 IU cholecalciferol single dose                                             | 16 weeks  |
| Witham et al <sup>16</sup> , Scotland, 2010b   | 105 | 56° N         | Older adults with heart failure                                       | Walk test, physical activity, cardiovascular and inflammatory markers, blood pressure | 80 | 66  | 22 | 141             | Placebo                     | Ergocalciferol 100,000 IU 10 weekly.                                                                             | 20 weeks  |
| de Zeeuw et al <sup>17</sup> ,                 | 281 | Multinational | Patients with Type II diabetes and                                    | Albuminuria, eGFR, blood                                                              | 64 | 65  | 41 | 142             | Placebo                     | Paricalcitol 1µg daily<br>Paricalcitol 2µg daily                                                                 | 24 weeks  |

|                                               |     |       |                                                                                         |                                                                                          |    |    |     |       |                                                     |                                                                                            |           |
|-----------------------------------------------|-----|-------|-----------------------------------------------------------------------------------------|------------------------------------------------------------------------------------------|----|----|-----|-------|-----------------------------------------------------|--------------------------------------------------------------------------------------------|-----------|
| Multinational, 2010                           |     |       | albuminuria receiving ACEi/ARBs                                                         | pressure                                                                                 |    |    |     |       |                                                     |                                                                                            |           |
| Harris et al <sup>18</sup> , USA, 2011        | 45  | 33° N | African-American Adults with no overt cardiovascular, pulmonary or metabolic disease    | Endothelial function, anthropometric assessments, blood pressure                         | 30 | 47 | 36  | 124   | Placebo                                             | Cholecalciferol 60,000IU/ 4 weekly                                                         | 16 weeks  |
| Shab-Bidar et al <sup>19</sup> , Iran 2011    | 100 | 36° N | Non-insulin requiring Type II Diabetes Mellitus                                         | Glycaemic status, lipid profile and endothelial biomarkers                               | 53 | 43 | 38  | 127   | Plain Yoghurt Drink with 170mg/ calcium twice a day | Cholecalciferol fortified yoghurt drink 170mg/calcium and 500IU/250ml twice daily          | 12 weeks  |
| Alvarez et al <sup>20</sup> , USA, 2012       | 48  | 34° N | Early chronic kidney disease                                                            | Vitamin D status, circulating PTH concentrations                                         | 62 | 95 | 74  | 129   | Placebo                                             | Cholecalciferol 50,000 IU/ week for 12 weeks then 50,000 IU every other week for 40 weeks. | 12 months |
| Bonakdaran et al <sup>21</sup> , Iran, 2012   | 51  | 35° N | Untreated Polycystic Ovarian syndrome Patients                                          | Improvement in ovulation, insulin resistance, blood pressure                             | 25 | 0  | 51  | 110   | Placebo                                             | Metformin 1g/day; Calcitriol 0.5µg/day                                                     | 3 months  |
| Gepner et al <sup>22</sup> , USA, 2012        | 114 | 43° N | Healthy community dwelling postmenopausal females with serum vitamin D >10 and <60ng/ml | Endothelial function (pulse wave velocity, flow mediated dilatation, augmentation index) | 64 | 0  | 78  | 119.4 | Placebo                                             | Cholecalciferol 2500 IU/day                                                                | 4 months  |
| Heshmat et al <sup>23</sup> , Iran, 2012      | 42  | 36° N | Type II Diabetes Mellitus                                                               | Insulin resistance and anthropometric factors                                            | 56 | 36 | 103 | 119   | Placebo                                             | Cholecalciferol 300,000IU once-off                                                         | 3 months  |
| Kjaergaard et al <sup>24</sup> , Norway, 2012 | 243 | 69° N | Adults aged 30-75 years                                                                 | Depressive symptoms,                                                                     | 53 | 44 | 48  | 129   | Placebo                                             | Cholecalciferol 40,000 IU once weekly                                                      | 6 months  |
| Larsen et al <sup>25</sup> , Denmark, 2012    | 130 | 56° N | Caucasian hypertensive patients                                                         | Blood pressure, arterial stiffness                                                       | 61 | 31 | 58  | 143   | Placebo                                             | Cholecalciferol 3000 IU/day                                                                | 20 weeks  |

|                                                  |     |          |                                                               |                                                                                       |    |    |    |       |                                                   |                                                                      |          |
|--------------------------------------------------|-----|----------|---------------------------------------------------------------|---------------------------------------------------------------------------------------|----|----|----|-------|---------------------------------------------------|----------------------------------------------------------------------|----------|
| Longenecker et al <sup>56</sup> , 2012, USA      | 45  | 42° N    | Vitamin D deficient HIV infected adults                       | Endothelial function                                                                  | 45 | 78 | 21 | 118   | Placebo                                           | Cholecalciferol 4000 IU daily                                        | 12 weeks |
| Muldowney et al <sup>27</sup> , Ireland 2012a    | 209 | 51-55° N | Older adults aged >64 years during winter                     | Biomarkers of cardiovascular disease risk                                             | 71 | 40 | 54 | 146   | Placebo                                           | Cholecalciferol 200 IU per day or 400 IU per day or 600 IU per day   | 22 weeks |
| Muldowney et al <sup>27</sup> , Ireland 2012b    | 233 | 51-55° N | Young adults aged 20-40 years during winter                   | Biomarkers of cardiovascular disease risk                                             | 30 | 51 | 70 | 124   | Placebo                                           | Cholecalciferol 200 IU per day or 400 IU per day or 600 IU per day   | 22 weeks |
| Salehpour et al <sup>28</sup> , Iran, 2012       | 85  | 36° N    | Healthy premenopausal overweight and obese women              | Blood pressure, lipid profile, anthropometric parameters                              | 38 | 0  | 42 | 113.5 | Placebo                                           | Cholecalciferol 1000 IU/day                                          | 90 days  |
| Stricker et al <sup>29</sup> , Switzerland, 2012 | 62  | 46° N    | Chronic peripheral vascular disease and vitamin D deficiency  | Endothelial function and arterial stiffness, coagulation and inflammation parameters. | 74 | 61 | 42 | 137   | Placebo                                           | Cholecalciferol (Vitamin D3) 100,000 IU single dose                  | 1 month  |
| Witham et al <sup>30</sup> , Scotland, 2012      | 58  | 56° N    | Older adults with previous stroke                             | Blood pressure, endothelial function                                                  | 67 | 72 | 38 | 128   | Placebo                                           | 100,000 IU Ergocalciferol                                            | 16 weeks |
| Wood et al <sup>31</sup> , Scotland, 2012        | 305 | 57° N    | Healthy Postmenopausal women aged 60-70 years                 | Lipid profile, insulin resistance, inflammatory biomarkers, blood pressure            | 64 | 0  | 34 | 128.5 | Placebo                                           | 400 IU/day Cholecalciferol<br>1000 IU/day Cholecalciferol            | 1 year   |
| Asemi et al <sup>32</sup> , Iran, 2013           | 54  | 34° N    | Pregnant women in Iran                                        | C-Reactive Protein, Insulin resistance and biomarkers of oxidative stress             | 25 | 0  | 40 | 112   | Placebo + 400µg/day folic acid + 60 µg/day iron   | Cholecalciferol 400 IU/day + 400µg/day folic acid + 60 µg/day iron   | 9 weeks  |
| Boxer et al <sup>33</sup> , USA, 2013            | 64  | 41° N    | Over 50 year olds with heart failure and vitamin D deficiency | Cardiopulmonary stress testing                                                        | 66 | 52 | 46 | 116   | Placebo once weekly + Calcium Citrate 400mg twice | Cholecalciferol 50,000 IU weekly + Calcium Citrate 400mg twice daily | 6 months |

|                                               |     |       |                                                              |                                                                                                            |    |    |           |     |                                   |                                                                                                                 |               |
|-----------------------------------------------|-----|-------|--------------------------------------------------------------|------------------------------------------------------------------------------------------------------------|----|----|-----------|-----|-----------------------------------|-----------------------------------------------------------------------------------------------------------------|---------------|
|                                               |     |       |                                                              |                                                                                                            |    |    |           |     | daily                             |                                                                                                                 |               |
| Breslavsky et al <sup>34</sup> , Israel, 2013 | 47  | 32° N | Type II Diabetics with cardiovascular risk factors           | Arterial properties, adiponectin, leptin and glucose homeostasis                                           | 66 | 47 | 30        | 153 | Placebo                           | Cholecalciferol 1000 IU/day                                                                                     | 12 months     |
| Chai et al <sup>35</sup> , USA, 2013          | 92  | 21° N | 30 – 75 year olds with adenomatous colorectal polyps         | Blood pressure, serum lipids and carotenoids                                                               | 61 | 70 | Not known | 126 | Placebo                           | Calcium carbonate 2g/day OR Cholecalciferol 800 IU/day OR Calcium carbonate 2g/day + Cholecalciferol 800 IU/day | 6 months      |
| Forman et al <sup>36</sup> , USA, 2013        | 283 | 42° N | Healthy Black Population                                     | Systolic and diastolic blood pressure                                                                      | 51 | 35 | 39        | 122 | Placebo +200mg calcium daily      | Cholecalciferol 1000 IU/day or 2000 IU/day or 4000 IU/day all + 200mg calcium daily                             | 3 months      |
| Larsen et al <sup>37</sup> 2013, Denmark      | 30  | 56° N | Non-diabetic, albuminuric stage II-IV chronic kidney disease | Plasma renin concentration, albuminuria                                                                    | 61 | 73 | 56        | 136 | Placebo                           | Paricalcitol 2 µg daily                                                                                         | 6 weeks       |
| Petchey et al <sup>38</sup> , Australia, 2013 | 28  | 28° S | Chronic Kidney Disease Stage 3-4                             | Insulin resistance                                                                                         | 66 | 71 | 91        | 135 | Placebo                           | Cholecalciferol 2000IU daily                                                                                    | 6 months      |
| Roth et al <sup>39</sup> , Bangladesh, 2013   | 160 | 24° N | Third trimester of pregnancy                                 | Vitamin D status                                                                                           | 22 | 0  | 45        | 104 | Placebo                           | Cholecalciferol 35,000 IU weekly                                                                                | Mean 10 weeks |
| Toxqui et al <sup>40</sup> , Spain, 2013      | 129 | 40° N | Healthy 18-35 year old Caucasian women                       | Iron and bone metabolism biomarkers, blood pressure, glucose and lipid levels                              | 25 | 0  | 63        | 109 | 15mg Iron-fortified dairy product | 15mg iron fortified dairy product and 200 IU cholecalciferol daily                                              | 16 weeks      |
| Wamberg et al <sup>41</sup> , Denmark, 2013   | 55  | 56° N | Obese subjects aged 18-50years with low vitamin D levels     | Obesity related complications such as chronic low grade inflammation, insulin resistance, hypertension and | 40 | 29 | 35        | 133 | Placebo                           | Cholecalciferol 7000 IU/day                                                                                     | 26 weeks      |

|                                                   |     |       |                                                              |                                                           |    |    |           |       |         |                                                                                              |           |
|---------------------------------------------------|-----|-------|--------------------------------------------------------------|-----------------------------------------------------------|----|----|-----------|-------|---------|----------------------------------------------------------------------------------------------|-----------|
|                                                   |     |       |                                                              | hyperlipidaemia                                           |    |    |           |       |         |                                                                                              |           |
| Witham 2013 et al <sup>42</sup> , Scotland, 2013a | 159 | 56° N | Isolated systolic hypertension in over 70 year olds          | Blood pressure, Endothelial function                      | 77 | 52 | 45        | 163   | Placebo | Cholecalciferol 100,000 IU three monthly                                                     | 12 months |
| Witham et al <sup>43</sup> , Scotland, 2013b      | 75  | 56° N | Recent myocardial infarction patients                        | Endothelial function, blood pressure, cholesterol         | 66 | 69 | 47        | 127.5 | Placebo | Cholecalciferol 100,000IU/ 2 monthly                                                         | 6 months  |
| Witham et al <sup>44</sup> , Scotland, 2013c      | 50  | 56° N | South-east Asian women living in UK for 10 years             | Macrovascular and microvascular endothelial function      | 41 | 0  | 27        | 120   | Placebo | Cholecalciferol 100,000 IU once off                                                          | 8 weeks   |
| Yiu et al <sup>45</sup> , Hong Kong 2013          | 100 | 22° N | Type II diabetes mellitus with suboptimal vitamin D status   | Endothelial function, endothelial progenitor cells, CRP   | 65 | 50 | 54        | 146   | Placebo | Cholecalciferol 5000 IU daily                                                                | 12 weeks  |
| Dalbeni et al <sup>46</sup> , Italy, 2014         | 36  | 45° N | Chronic heart failure aged >40 years                         | Ejection fraction and echocardiography parameters         | 72 | 74 | 44        | 133   | Placebo | Cholecalciferol 600,000 IU at baseline, 100,000 IU at 10 weeks and 20 weeks                  | 6 months  |
| Scragg et al <sup>47</sup> , New Zealand, 2014    | 322 | 44° S | Healthy adults                                               | Number and severity of upper respiratory tract infections | 48 | 25 | 71        | 123   | Placebo | Cholecalciferol 200000 IU first month, 200000 IU second month then 100000 IU monthly         | 18 months |
| Sollid et al <sup>48</sup> , Norway, 2014         | 511 | 70° N | Prediabetes                                                  | Glucose metabolism and cardiovascular risk factors        | 62 | 61 | 61        | 135   | Placebo | Cholecalciferol 20000 IU weekly                                                              | 12 months |
| Strobel et al <sup>49</sup> , Germany 2014        | 86  | 50° N | Non-insulin requiring Type II Diabetes Mellitus              | Insulin resistance and blood glucose levels               | 60 | 56 | 36        | 141   | Placebo | Cholecalciferol 1904IU/day Once Weekly                                                       | 6 months  |
| Wang et al <sup>50</sup> , Hong Kong, 2014        | 60  | 23° N | Stage 3-5 non-dialysis CKD with left ventricular hypertrophy | Change in Left Ventricular mass index                     | 61 | 53 | Not known | 133   | Placebo | Paricalcitol – if iPTH<500pg/ml<br>Paricalcitol 1µg<br>If iPTH >500pg/ml<br>Paricalcitol 2µg | 12 months |



|                                             |    |       |                        |                                                                      |    |    |    |     |         |                                           |          |
|---------------------------------------------|----|-------|------------------------|----------------------------------------------------------------------|----|----|----|-----|---------|-------------------------------------------|----------|
| Witham et al <sup>51</sup> , Scotland, 2014 | 68 | 56° N | Resistant hypertension | Blood pressure, glucose, cholesterol and Left ventricular mass index | 63 | 65 | 42 | 154 | Placebo | Cholecalciferol 100,000 IU every 2 months | 6 months |
|---------------------------------------------|----|-------|------------------------|----------------------------------------------------------------------|----|----|----|-----|---------|-------------------------------------------|----------|

**eTable 2: Risk of Bias Table for All Included Studies**

| Study                         | Quality of allocation concealment | Analysis on intention to treat | Number and description of dropouts | Blinding – patients | Blinding – health care providers | Blinding – outcome assessors | Comparable treatment and placebo groups |
|-------------------------------|-----------------------------------|--------------------------------|------------------------------------|---------------------|----------------------------------|------------------------------|-----------------------------------------|
| Lind 1987 <sup>1</sup>        | +                                 | U                              | +                                  | U                   | U                                | U                            | -                                       |
| Lind 1988a <sup>2</sup>       | +                                 | +                              | +                                  | +                   | +                                | U                            | +                                       |
| Lind 1988b <sup>3</sup>       | +                                 | U                              | -                                  | +                   | +                                | +                            | -                                       |
| Lind 1989 <sup>4</sup>        | +                                 | +                              | +                                  | +                   | +                                | U                            | +                                       |
| Myrup 1992 <sup>5</sup>       | +                                 | U                              | -                                  | +                   | +                                | +                            | +                                       |
| Pan 1993 <sup>6</sup>         | +                                 | -                              | +                                  | +                   | +                                | +                            | -                                       |
| Scragg 1995 <sup>7</sup>      | +                                 | +                              | +                                  | +                   | +                                | +                            | +                                       |
| Pfeifer 2001 <sup>8</sup>     | +                                 | +                              | +                                  | +                   | +                                | +                            | +                                       |
| Schleithoff 2006 <sup>9</sup> | +                                 | -                              | +                                  | +                   | +                                | +                            | +                                       |
| Alborzi 2008 <sup>10</sup>    | +                                 | +                              | +                                  | +                   | +                                | +                            | -                                       |
| Sugden 2008 <sup>11</sup>     | +                                 | -                              | +                                  | +                   | +                                | +                            | +                                       |
| Nagpal 2009 <sup>12</sup>     | +                                 | +                              | +                                  | +                   | +                                | +                            | +                                       |
| Zittermann 2009 <sup>13</sup> | +                                 | U                              | +                                  | +                   | +                                | +                            | +                                       |
| Jorde 2010 <sup>14</sup>      | +                                 | -                              | +                                  | +                   | +                                | +                            | +                                       |
| Witham 2010a <sup>15</sup>    | +                                 | U                              | +                                  | +                   | +                                | +                            | +                                       |
| Witham 2010b <sup>16</sup>    | +                                 | +                              | +                                  | +                   | +                                | +                            | +                                       |
| de Zeeuw 2010 <sup>17</sup>   | +                                 | +                              | +                                  | +                   | +                                | +                            | +                                       |
| Harris 2011 <sup>18</sup>     | +                                 | U                              | +                                  | +                   | +                                | +                            | +                                       |
| Shab-Bidar 2011 <sup>19</sup> | +                                 | -                              | +                                  | +                   | +                                | +                            | +                                       |

|                                |   |   |   |   |   |   |   |
|--------------------------------|---|---|---|---|---|---|---|
| Alvarez 2012 <sup>20</sup>     | + | + | + | + | + | + | + |
| Bonakdaran 2012 <sup>21</sup>  | - | - | + | U | U | U | - |
| Gepner 2012 <sup>22</sup>      | + | + | + | + | + | + | + |
| Heshmat 2012 <sup>23</sup>     | + | U | + | + | + | + | - |
| Kjærgaard 2012 <sup>24</sup>   | + | - | + | + | + | + | + |
| Larsen 2012 <sup>25</sup>      | + | - | + | + | + | + | + |
| Longenecker 2012 <sup>26</sup> | + | U | + | + | + | + | + |
| Muldowney 2012a <sup>27</sup>  | + | - | + | + | + | + | + |
| Muldowney 2012b <sup>27</sup>  | + | - | + | + | + | + | + |
| Salehpour 2012 <sup>28</sup>   | + | U | + | + | + | + | - |
| Stricker2012 <sup>29</sup>     | + | + | + | + | + | + | - |
| Witham2012 <sup>30</sup>       | + | U | + | + | + | + | + |
| Wood 2012 <sup>31</sup>        | + | + | + | + | + | + | + |
| Asemi 2013 <sup>32</sup>       | + | - | + | + | + | - | + |
| Boxer 2013 <sup>33</sup>       | + | + | + | + | + | + | + |
| Breslavsky 2013 <sup>34</sup>  | + | - | + | U | U | U | + |
| Chai 2013 <sup>35</sup>        | + | U | + | + | + | + | - |
| Forman 2013 <sup>36</sup>      | + | + | + | + | + | + | - |
| Larsen 2013 <sup>37</sup>      | + | - | + | + | + | + | U |
| Petchey 2013 <sup>38</sup>     | + | - | + | + | + | + | - |
| Roth 2013 <sup>39</sup>        | + | + | + | + | + | + | + |
| Toxqui 2013 <sup>40</sup>      | + | - | + | + | + | + | + |
| Wamberg 2013 <sup>41</sup>     | + | + | + | + | + | + | + |

|                            |   |   |   |   |   |   |   |
|----------------------------|---|---|---|---|---|---|---|
| Witham 2013a <sup>42</sup> | + | - | + | + | + | + | + |
| Witham 2013b <sup>43</sup> | + | + | + | + | + | + | + |
| Witham 2013c <sup>44</sup> | + | + | + | + | + | + | + |
| Yiu 2013 <sup>45</sup>     | + | + | + | + | + | + | + |
| Dalbeni 2014 <sup>46</sup> | + | - | - | + | + | + | - |
| Scragg 2014 <sup>47</sup>  | + | + | + | + | + | + | + |
| Sollid 2014 <sup>48</sup>  | + | - | + | + | + | + | + |
| Strobel 2014 <sup>49</sup> | + | - | + | + | + | + | + |
| Wang 2014 <sup>50</sup>    | + | + | + | + | + | + | + |
| Witham 2014 <sup>51</sup>  | + | + | + | + | + | + | + |

+ Adequate / yes, - Inadequate / no, U: Unclear

## References

1. Lind L, Wengle B, Ljunghall S. Blood pressure is lowered by vitamin D (alphacalcidol) during long-term treatment of patients with intermittent hypercalcaemia. A double-blind, placebo-controlled study. *Acta Med Scand* 1987;222(5):423-427.
2. Lind L, Wengle B, Wide L, Sorensen OH, Ljunghall S. Hypertension in primary hyperparathyroidism--reduction of blood pressure by long-term treatment with vitamin D (alphacalcidol). A double-blind, placebo-controlled study. *Am J Hypertens* 1988;1(4 Pt 1):397-402.
3. Lind L, Lithell H, Skarfors E, Wide L, Ljunghall S. Reduction of blood pressure by treatment with alphacalcidol. A double-blind, placebo-controlled study in subjects with impaired glucose tolerance. *Acta Med Scand* 1988;223(3):211-217.
4. Lind L, Wengle B, Wide L, Ljunghall S. Reduction of blood pressure during long-term treatment with active vitamin D (alphacalcidol) is dependent on plasma renin activity and calcium status. A double-blind, placebo-controlled study. *Am J Hypertens* 1989;2(1):20-25.
5. Myrup B, Jensen GF, McNair P. Cardiovascular risk factors during estrogen-norethindrone and cholecalciferol treatment. *Arch Intern Med* 1992;152(11):2265-2268.
6. Pan WH, Wang CY, Li LA, Kao LS, Yeh SH. No significant effect of calcium and vitamin D supplementation on blood pressure and calcium metabolism in elderly Chinese. *Chin J Physiol* 1993;36(2):85-94.
7. Scragg R, Khaw KT, Murphy S. Effect of winter oral vitamin D3 supplementation on cardiovascular risk factors in elderly adults. *Eur J Clin Nutr* 1995;49(9):640-646.
8. Pfeifer M, Begerow B, Minne HW, Nachtigall D, Hansen C. Effects of a short-term vitamin D(3) and calcium supplementation on blood pressure and parathyroid hormone levels in elderly women. *J Clin Endocrinol Metab* 2001 Apr;86(4):1633-1637.
9. Schleithoff SS, Zittermann A, Tenderich G, Berthold HK, Stehle P, Koerfer R. Vitamin D supplementation improves cytokine profiles in patients with congestive heart failure: a double-blind, randomized, placebo-controlled trial. *Am J Clin Nutr* 2006 Apr;83(4):754-759.
10. Alborzi P, Patel NA, Peterson C, et al. Paricalcitol reduces albuminuria and inflammation in chronic kidney disease: a randomized double-blind pilot trial. *Hypertension* 2008 Aug;52(2):249-255.
11. Sugden JA, Davies JI, Witham MD, Morris AD, Struthers AD. Vitamin D improves endothelial function in patients with type 2 diabetes mellitus and low vitamin D levels. *Diabet Med* 2008;25(3):320-325.

12. Nagpal J, Pande JN, Bhartia A. A double-blind, randomized, placebo-controlled trial of the short-term effect of vitamin D3 supplementation on insulin sensitivity in apparently healthy, middle-aged, centrally obese men. *Diabet Med* 2009;26(1):19-27.
13. Zittermann A, Frisch S, Berthold HK, et al. Vitamin D supplementation enhances the beneficial effects of weight loss on cardiovascular disease risk markers. *Am J Clin Nutr* 2009;89(5):1321-1327.
14. Jorde R, Sneve M, Torjesen P, Figenschau Y. No improvement in cardiovascular risk factors in overweight and obese subjects after supplementation with vitamin D3 for 1 year. *J Intern Med* 2010;267(5):462-472.
15. Witham MD, Dove FJ, Dryburgh M, Sugden JA, Morris AD, Struthers AD. The effect of different doses of vitamin D(3) on markers of vascular health in patients with type 2 diabetes: a randomised controlled trial. *Diabetologia* 2010 Oct;53(10):2112-2119.
16. Witham MD, Crighton LJ, Gillespie ND, Struthers AD, McMurdo ME. The effects of vitamin D supplementation on physical function and quality of life in older patients with heart failure: a randomized controlled trial. *Circ Heart Fail* 2010;3(2):195-201.
17. de Zeeuw D, Agarwal R, Amdahl M, et al. Selective vitamin D receptor activation with paricalcitol for reduction of albuminuria in patients with type 2 diabetes (VITAL study): a randomised controlled trial. *Lancet* 2010 Nov 6;376(9752):1543-1551.
18. Harris RA, Pedersen-White J, Guo DH, et al. Vitamin D3 supplementation for 16 weeks improves flow-mediated dilation in overweight African-American adults. *Am J Hypertens* 2011;24(5):557-562.
19. Shab-Bidar S, Neyestani TR, Djazayeri A, et al. Regular consumption of vitamin D-fortified yogurt drink (Doogh) improved endothelial biomarkers in subjects with type 2 diabetes: a randomized double-blind clinical trial. *BMC Med* 2011;9:125.
20. Alvarez JA, Law J, Coakley KE, et al. High-dose cholecalciferol reduces parathyroid hormone in patients with early chronic kidney disease: a pilot, randomized, double-blind, placebo-controlled trial. *Am J Clin Nutr* 2012;96(3):672-679.
21. Bonakdaran S, Hami M, Hatefi A. The effects of calcitriol on albuminuria in patients with type-2 diabetes mellitus. *Saudi J Kidney Dis Transpl* 2012;23(6):1215-1220.
22. Gepner AD, Ramamurthy R, Krueger DC, Korcarz CE, Binkley N, Stein JH. A prospective randomized controlled trial of the effects of vitamin D supplementation on cardiovascular disease risk. *PLoS One* 2012;7(5):e36617.
23. Heshmat R, Tabatabaei-Malazy O, Abbaszadeh-Ahranjani S, et al. Effect of vitamin D on insulin resistance and anthropometric parameters in Type 2 diabetes; a randomized double-blind clinical trial. *Daru* 2012;20(1):10.

24. Kjaergaard M, Waterloo K, Wang CE, et al. Effect of vitamin D supplement on depression scores in people with low levels of serum 25-hydroxyvitamin D: nested case-control study and randomised clinical trial. *Br J Psychiatry* 2012 Nov;201(5):360-368.
25. Larsen T, Mose FH, Bech JN, Hansen AB, Pedersen EB. Effect of cholecalciferol supplementation during winter months in patients with hypertension: a randomized, placebo-controlled trial. *Am J Hypertens* 2012;25(11):1215-1222.
26. Longenecker CT, Hileman CO, Carman TL, et al. Vitamin D supplementation and endothelial function in vitamin D deficient HIV-infected patients: a randomized placebo-controlled trial. *Antivir Ther* 2012;17(4):613-621.
27. Muldowney S, Lucey AJ, Hill TR, et al. Incremental cholecalciferol supplementation up to 15 mug/d throughout winter at 51-55 degrees N has no effect on biomarkers of cardiovascular risk in healthy young and older adults. *J Nutr* 2012;142(8):1519-1525.
28. Salehpour A, Shidfar F, Hosseinpanah F, et al. Vitamin D3 and the risk of CVD in overweight and obese women: a randomised controlled trial. *Br J Nutr* 2012;108(10):1866-1873.
29. Stricker H, Tosi BF, Guidicelli-Nicolosi S, Limoni C, Colucci G. Effect of a single, oral, high-dose vitamin D supplementation on endothelial function in patients with peripheral arterial disease: a randomised controlled pilot study. *Eur J Vasc Endovasc Surg* 2012;44(3):307-312.
30. Witham MD, Dove FJ, Sugden JA, Doney AS, Struthers AD. The effect of vitamin D replacement on markers of vascular health in stroke patients - A randomised controlled trial. *Nutr Metab Cardiovasc Dis* 2012;22(10):864-870.
31. Wood AD, Secombes KR, Thies F, et al. Vitamin D3 Supplementation Has No Effect on Conventional Cardiovascular Risk Factors. A Parallel-Group, Double-Blind, Placebo-Controlled RCT. *J Clin Endocrinol Metab* 2012;97(10):3557-3568.
32. Asemi Z, Hashemi T, Karamali M, Samimi M, Esmailzadeh A. Effects of vitamin D supplementation on glucose metabolism, lipid concentrations, inflammation, and oxidative stress in gestational diabetes: a double-blind randomized controlled clinical trial. *Am J Clin Nutr* 2013;98(6):1425-1432.
33. Boxer RS, Kenny AM, Schmotzer BJ, Vest M, Fiutem JJ, Pina II. A randomized controlled trial of high-dose vitamin D3 in patients with heart failure. *JACC Heart Fail* 2013;1(1):84-90.
34. Breslavsky A, Frand J, Matas Z, Boaz M, Barnea Z, Shargorodsky M. Effect of high doses of vitamin D on arterial properties, adiponectin, leptin and glucose homeostasis in type 2 diabetic patients. *Clin Nutr* 2013;32(6):970-975.
35. Chai W, Cooney RV, Franke AA, Bostick RM. Effects of calcium and vitamin D supplementation on blood pressure and serum lipids and carotenoids: a randomized, double-blind, placebo-controlled, clinical trial. *Ann Epidemiol* 2013;23(9):564-570.

36. Forman JP, Scott JB, Ng K, et al. Effect of vitamin D supplementation on blood pressure in blacks. *Hypertension* 2013;61(4):779-785.
37. Larsen T, Mose FH, Bech JN, Pedersen EB. Effect of paricalcitol on renin and albuminuria in non-diabetic stage III-IV chronic kidney disease: a randomized placebo-controlled trial. *BMC Nephrol* 2013 Jul 26;14(1):163.
38. Petchey WG, Hickman IJ, Prins JB, Hawley CM, Johnson DW, Isbel NM, et al. Vitamin D does not improve the metabolic health of patients with chronic kidney disease stage 3-4: a randomized controlled trial. *Nephrology* 2013;18(1):26-35.
39. Roth DE, Al Mahmud A, Raqib R, et al. Randomized placebo-controlled trial of high-dose prenatal third-trimester vitamin D3 supplementation in Bangladesh: the AViDD trial. *Nutr J* 2013;12(1):47.
40. Toxqui L, Blanco-Rojo R, Wright I, Perez-Granados AM, Vaquero MP. Changes in blood pressure and lipid levels in young women consuming a vitamin D-fortified skimmed milk: a randomised controlled trial. *Nutrients* 2013;5(12):4966-4977.
41. Wamberg L, Kampmann U, Stodkilde-Jorgensen H, Rejnmark L, Pedersen SB, Richelsen B. Effects of vitamin D supplementation on body fat accumulation, inflammation, and metabolic risk factors in obese adults with low vitamin D levels - results from a randomized trial. *Eur J Intern Med* 2013;24(7):644-649.
42. Witham MD, Price RJ, Struthers AD, et al. Cholecalciferol treatment to reduce blood pressure in older patients with isolated systolic hypertension: the VitDISH randomized controlled trial. *JAMA Intern Med* 2013;173(18):1672-1679.
43. Witham MD, Dove FJ, Khan F, Lang CC, Belch JJ, Struthers AD. Effects of vitamin D supplementation on markers of vascular function after myocardial infarction--a randomised controlled trial. *Int J Cardiol* 2013;167(3):745-749.
44. Witham MD, Adams F, Kabir G, Kennedy G, Belch JJ, Khan F. Effect of short-term vitamin D supplementation on markers of vascular health in South Asian women living in the UK--a randomised controlled trial. *Atherosclerosis* 2013;230(2):293-299.
45. Yiu YF, Yiu KH, Siu CW, et al. Randomized controlled trial of vitamin D supplement on endothelial function in patients with type 2 diabetes. *Atherosclerosis* 2013;227(1):140-146.
46. Dalbeni A, Scaturro G, Degan M, Minuz P, Delva P. Effects of six months of vitamin D supplementation in patients with heart failure: A randomized double-blind controlled trial. *Nutr Metab Cardiovasc Dis* 2014;24(8):861-868.
47. Scragg R, Slow S, Stewart AW, et al. Long-Term High-Dose Vitamin D3 Supplementation and Blood Pressure in Healthy Adults: A Randomized Controlled Trial. *Hypertension* 2014;64(4):725-730.



48. Sollid ST, Hutchinson MY, Fuskevag OM, et al. No Effect of High-Dose Vitamin D Supplementation on Glycemic Status or Cardiovascular Risk Factors in Subjects With Prediabetes. *Diabetes Care* 2014;37(8):2123-2131.
49. Strobel F, Reusch J, Penna-Martinez M, et al. Effect of a randomised controlled vitamin D trial on insulin resistance and glucose metabolism in patients with type 2 diabetes mellitus. *Horm Metab Res* 2014;46(1):54-58.
50. Wang AY, Fang F, Chan J, et al. Effect of paricalcitol on left ventricular mass and function in CKD--the OPERA trial. *J Am Soc Nephrol* 2014;25(1):175-186.
51. Witham MD, Ireland S, Houston JG, et al. Vitamin D therapy to reduce blood pressure and left ventricular hypertrophy in resistant hypertension: randomized, controlled trial. *Hypertension* 2014;63(4):706-712.

**eFigure 1. Funnel Plot for Trial-Level Systolic Blood Pressure Treatment Effects**

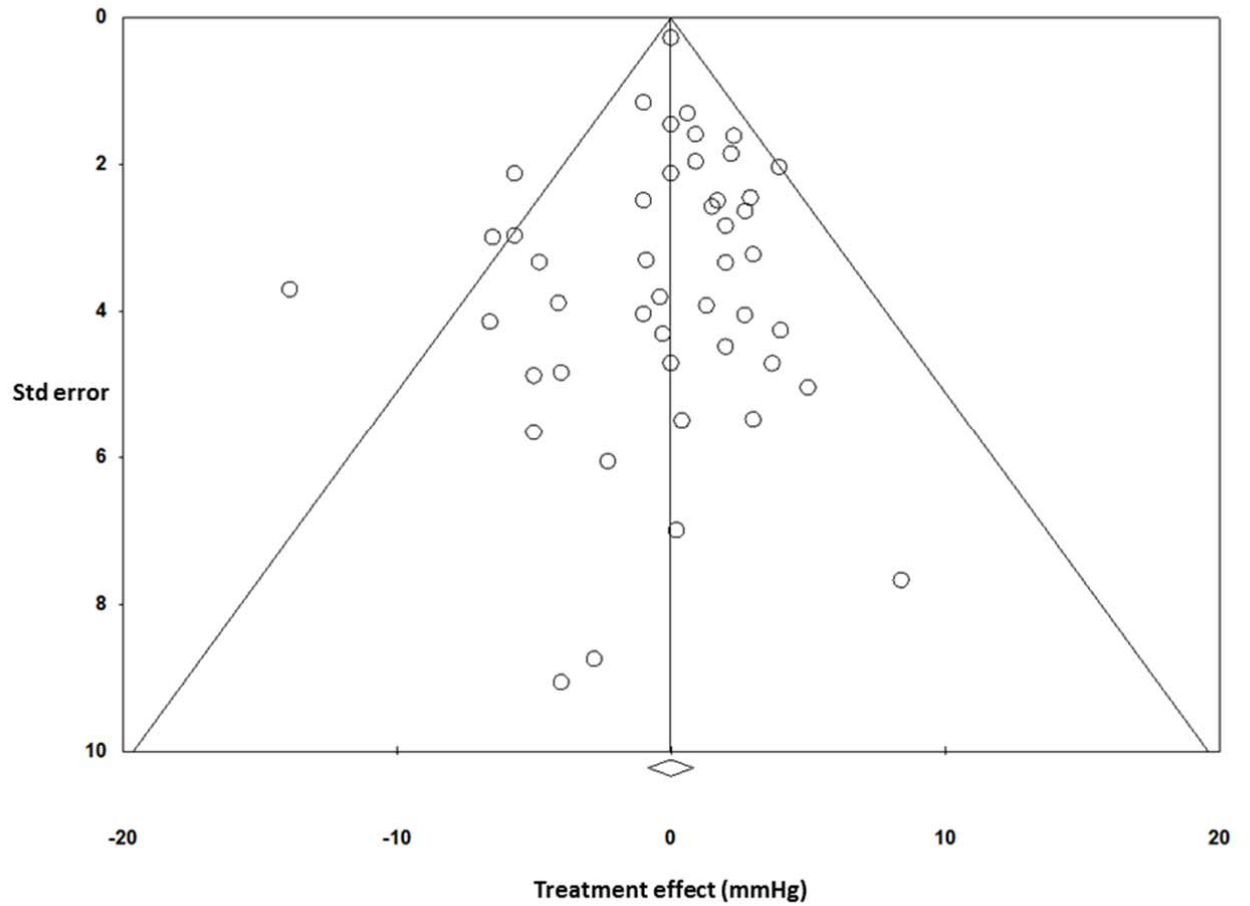

**eFigure 2. Results of Trial-Level Meta-analysis for Diastolic Blood Pressure Outcomes**

| Source                               | Treatment Group, No. of Patients |         | Difference in Mean DBP Between Groups (95% CI) |
|--------------------------------------|----------------------------------|---------|------------------------------------------------|
|                                      | Vitamin D Supplement             | Placebo |                                                |
| Lind et al, <sup>1</sup> 1987        | 15                               | 10      | -9.2 (-15.3 to 3.1)                            |
| Lind et al, <sup>2</sup> 1988        | 15                               | 16      | -6.7 (-12.3 to -1.1)                           |
| Lind et al, <sup>3</sup> 1988        | 33                               | 32      | -1.6 (-6.1 to 2.9)                             |
| Lind et al, <sup>4</sup> 1989        | 18                               | 21      | 0.4 (-3.8 to 4.6)                              |
| Scragg et al, <sup>7</sup> 1995      | 95                               | 94      | 0.0 (-2.6 to 2.6)                              |
| Pfeifer et al, <sup>8</sup> 2001     | 73                               | 72      | -0.3 (-3.5 to 2.9)                             |
| Sugden et al, <sup>11</sup> 2008     | 17                               | 17      | -4.5 (-9.4 to 0.4)                             |
| Nagpal et al, <sup>12</sup> 2009     | 35                               | 36      | 1.7 (-1.5 to 4.9)                              |
| Zitterman et al, <sup>13</sup> 2009  | 82                               | 83      | 0.0 (-2.9 to 2.9)                              |
| Jorde et al, <sup>14</sup> 2010      | 114                              | 112     | 0.8 (-1.2 to 2.8)                              |
| Witham et al, <sup>16</sup> 2010a    | 48                               | 48      | 0.5 (-6.7 to 5.7)                              |
| Witham et al, <sup>15</sup> 2010b    | 19                               | 21      | 0.3 (-5.8 to 6.4)                              |
| Harris et al, <sup>18</sup> 2011     | 23                               | 22      | 0.6 (-2.7 to 3.9)                              |
| Shab-Bidar et al, <sup>19</sup> 2011 | 50                               | 50      | -2.9 (-6.2 to 0.5)                             |
| Alvarez et al, <sup>20</sup> 2012    | 17                               | 20      | 5.4 (-2.7 to 13.5)                             |
| Bonakdaran et al, <sup>21</sup> 2012 | 15                               | 18      | -2.3 (7.6 to 3.0)                              |
| Gepner et al, <sup>22</sup> 2012     | 55                               | 55      | -0.3 (-2.1 to 1.5)                             |
| Heshmat et al, <sup>23</sup> 2012    | 21                               | 21      | -0.1 (-0.6 to 0.4)                             |
| Kjaergaard et al, <sup>24</sup> 2012 | 120                              | 110     | 0.0 (-1.8 to 1.8)                              |
| Muldowney et al, <sup>27</sup> 2012  | 48                               | 52      | 0.0 (-4.3 to 4.3)                              |
| Salehpour et al, <sup>28</sup> 2012  | 40                               | 37      | 2.2 (-1.2 to 5.5)                              |
| Stricker et al, <sup>29</sup> 2012   | 31                               | 31      | 0.0 (-4.3 to 4.3)                              |
| Witham et al, <sup>30</sup> 2012     | 29                               | 27      | 0.7 (-3.6 to 5.0)                              |
| Wood et al, <sup>31</sup> 2012       | 96                               | 100     | 1.2 (-0.3 to 2.7)                              |
| Asemi et al, <sup>32</sup> 2013      | 24                               | 24      | -3.5 (-6.6 to -0.4)                            |
| Boxer et al, <sup>33</sup> 2013      | 24                               | 24      | -0.8 (-5.7 to 4.1)                             |
| Breslavsky et al, <sup>34</sup> 2013 | 19                               | 13      | -2.1 (-8.5 to 4.3)                             |
| Chai et al, <sup>35</sup> 2013       | 22                               | 21      | -0.2 (-6.7 to 6.3)                             |
| Forman et al, <sup>36</sup> 2013     | 70                               | 72      | -2.5 (-6.8 to 1.8)                             |
| Larsen et al, <sup>37</sup> 2013     | 26                               | 26      | -1.0 (-4.3 to 2.3)                             |
| Petchey et al, <sup>38</sup> 2013    | 11                               | 14      | -2.9 (-10.1 to 4.3)                            |
| Roth et al, <sup>39</sup> 2013       | 67                               | 65      | 1.7 (-1.4 to 4.9)                              |
| Toxqui et al, <sup>40</sup> 2013     | 55                               | 54      | -2.2 (-5.1 to 0.7)                             |
| Wamberg et al, <sup>41</sup> 2013    | 22                               | 21      | -4.0 (-10.6 to 2.6)                            |
| Witham et al, <sup>42</sup> 2013     | 73                               | 69      | 1.0 (-1.4 to 3.4)                              |
| Witham et al, <sup>43</sup> 2013     | 38                               | 36      | 1.2 (-2.7 to 5.1)                              |
| Witham et al, <sup>44</sup> 2013     | 24                               | 25      | 0.4 (-2.6 to 3.4)                              |
| Yiu et al, <sup>45</sup> 2013        | 50                               | 50      | 2.0 (-1.2 to 5.2)                              |
| Dalbeni et al, <sup>46</sup> 2014    | 13                               | 10      | 3.4 (-5.6 to 12.4)                             |
| Scragg et al, <sup>47</sup> 2014     | 149                              | 151     | 0.0 (-1.6 to 1.6)                              |
| Sollid et al, <sup>48</sup> 2014     | 242                              | 242     | 0.0 (-1.6 to 1.6)                              |
| Strobel et al, <sup>49</sup> 2014    | 39                               | 36      | 2.8 (-2.6 to 8.2)                              |
| Wang et al, <sup>50</sup> 2014       | 30                               | 30      | -1.0 (-7.1 to 5.1)                             |
| Witham et al, <sup>51</sup> 2014     | 31                               | 30      | 6.0 (-1.7 to 10.3)                             |
| <b>Overall</b>                       |                                  |         | <b>0.1 (-0.6 to 0.5)</b>                       |

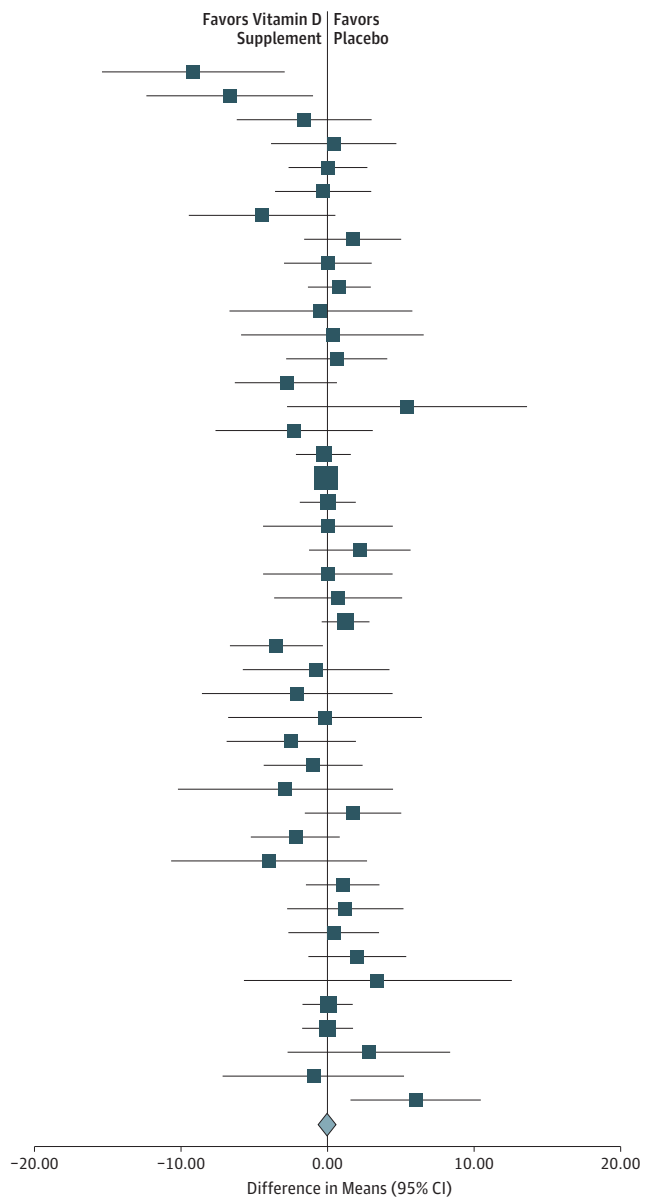

Different sizes of data markers correspond to the relative weight assigned in the pooled analysis. Diamond marker indicates overall result.

**eFigure 3. Meta-regression of Treatment Effect vs Mean Trial-Level Baseline Systolic Blood Pressure**

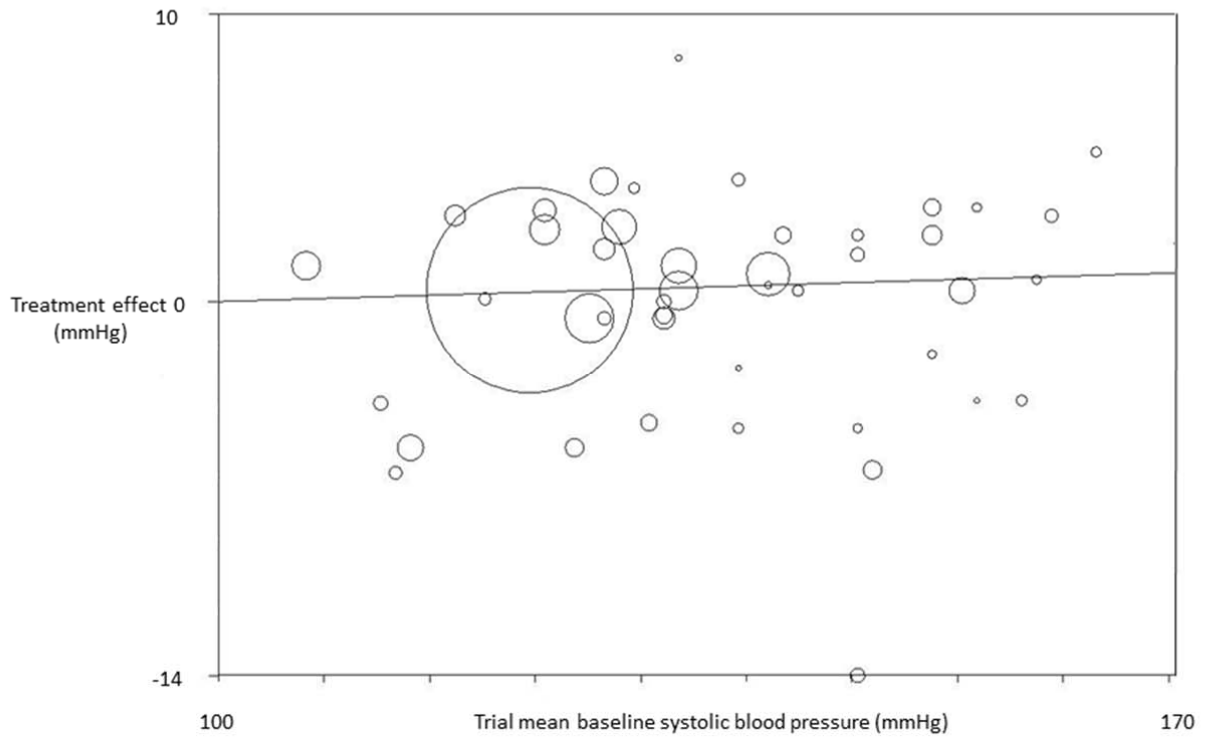

**eFigure 4. Results of Individual Patient Data Analysis Using Final Diastolic Blood Pressure (BP) Adjusted for Baseline BP**

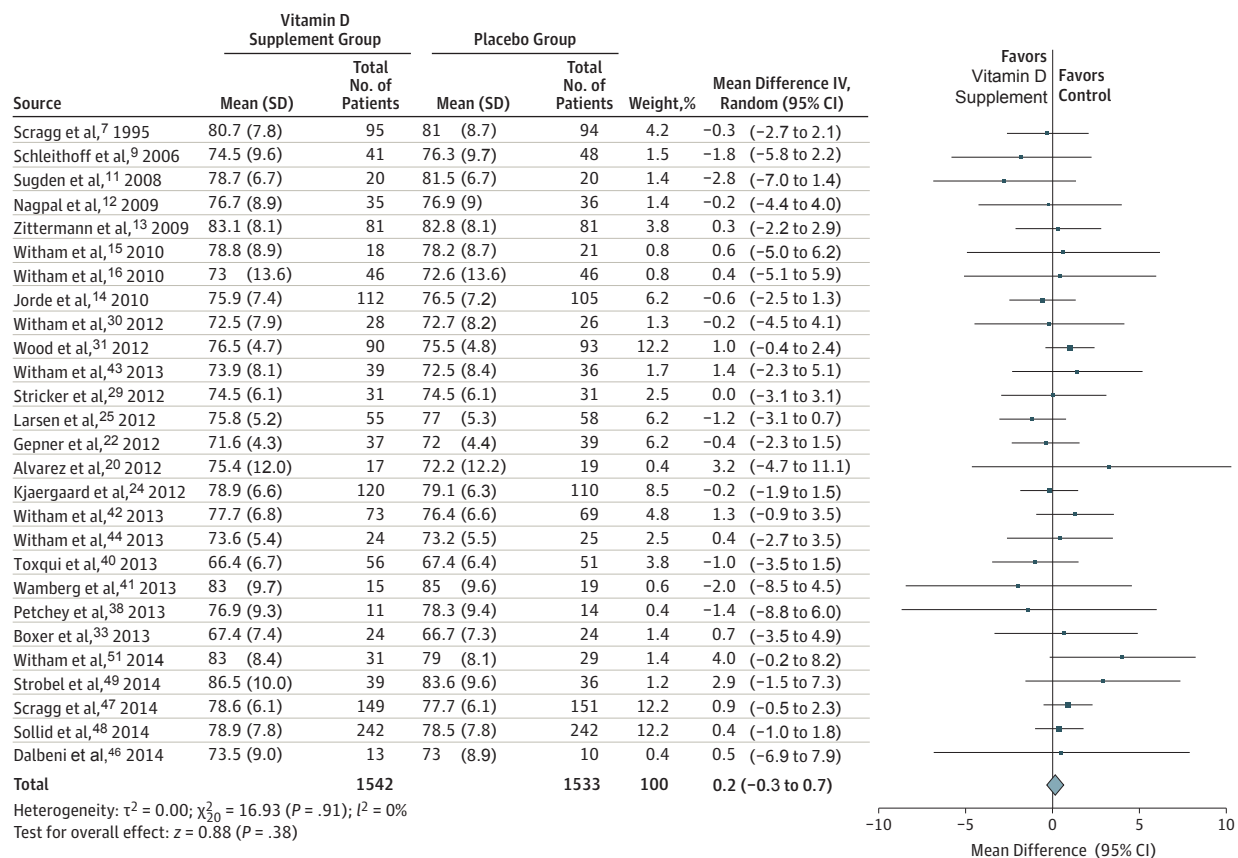

Different sizes of data markers correspond to the relative weight assigned in the pooled analysis. Diamond marker indicates overall result.
